# Supplementary material for: Variation in Procedural Denials of Medicaid Eligibility Across States Before the COVID-19 Pandemic
Source: PubMed Central journal article supplement (PMC10656645; doi:10.1001/jamahealthforum.2023.3892), 2023-11-17
Supplement: jamahealthforum-e233892-s002.pdf [file jamahealthforum-e233892-s002.pdf]

## Data Sharing Statement

Schpero. Variation in Procedural Denials of Medicaid Eligibility Across States Before the COVID-19 Pandemic. *JAMA Health Forum*. Published November 17, 2023.

doi:10.1001/jamahealthforum.2023.3892

### Data

**Data available:** Yes

**Data types:** Data (not involving human participants), Data dictionary

**How to access data:** Data are available upon request from the corresponding author at [wls4001@med.cornell.edu](mailto:wls4001@med.cornell.edu).

**When available:** With publication

### Supporting Documents

**Document types:** None

### Additional Information

**Who can access the data:** Data will be made available to anyone requesting the data.

**Types of analyses:** Data will be made available for any purpose.

**Mechanisms of data availability:** Data will be made available to anyone requesting the data.
